# Supplementary material for: Fission yeast mitochondria are distributed by dynamic microtubules in a motor-independent manner
Source: PubMed Central journal article supplement (PMC4457142; doi:10.1038/srep11023), 2015-06-05

**Fission yeast mitochondria are distributed by dynamic microtubules in a motor-independent manner**

Tianpeng Li<sup>1,3</sup>, Fan Zheng<sup>1,3</sup>, Martin Cheung<sup>2</sup>, Fengsong Wang<sup>4</sup>, Chuanhai Fu<sup>1,3,\*</sup>

<sup>1</sup>Department of Biochemistry, <sup>2</sup>Department of Anatomy, The University of Hong Kong, Pokfulam, Hong Kong, China

<sup>3</sup>HKU-Shenzhen Institute of Research and Innovation, The University of Hong Kong, Shenzhen, China

<sup>4</sup>School of Life Sciences, Anhui Medical University, Hefei, Anhui 230032, China

\*Correspondence should be addressed to C.F. ([chuanhai@hku.hk](mailto:chuanhai@hku.hk)) (Phone: (+852) 3917 9208; Fax: (+852) 2855 1254)

**Supplementary Information includes**

Supplementary figure legends S1-3

Supplementary imaging conditions

Supplementary tables S1 and S2

Supplementary figure S1-3

## **Supplementary figure legends**

### **Figure S1: TagRFP tagged ase1p microtubule binding domain localizes to microtubules, and TagRFP tagged tom22p cannot rescue mitochondria aggregation defects in mmb1 $\Delta$ cells.**

(a) Schematic diagram depicting the subcellular localization of TagRFP tagged ase1p microtubule binding domain (ase1(MtB)-RFP) and TagRFP tagged tom22p (RFP-tom22). Domain structures of the two fusion proteins are illustrated.

(b) Maximum projection images of wild type cells expressing GFP-cox4p and TagRFP-tom22p. The cells were treated either with DMSO or with MBC for 10 min before imaging. TagRFP-tom22 colocalized with mitochondria in the absence or presence of microtubules. Scale bar, 5  $\mu$ m.

(c) Quantification of the indicated patterns of mitochondria distribution in WT, WT TagRFP-tom22, mmb1 $\Delta$ , and mmb1 $\Delta$  TagRFP-tom22 cells. Note that TagRFP-tom22 did not cause mitochondria aggregation in WT cells, nor did it rescue mitochondria aggregation defects in mmb1 $\Delta$  cells.

(d) Maximum projection images of wild type cells expressing GFP-atb2p and ase1-TagRFP. The cells were treated either with DMSO or with MBC for 10 min before imaging. As expected, ase1-TagRFP localized to microtubules. Scale bar, 5  $\mu$ m.

(e) Quantification of the indicated patterns of mitochondria distribution in WT, WT ase1(MtB)-TagRFP, mmb1 $\Delta$ , and mmb1 $\Delta$  ase1(MtB)-TagRFP cells. Note that ase1(MtB)-TagRFP did not cause mitochondria aggregation in WT cells, nor did it rescue mitochondria aggregation defects in mmb1 $\Delta$  cells.

### **Figure S2: Ectopic expression of TagRFP tagged tom22p has no effect on mitochondria aggregation.**

(a) Schematic diagram depicting the subcellular localization of TagRFP tagged klp3 motor domain (GFP-klp3(MDo)).

(b) Maximum projection images of wild type cells expressing RFP-cox4p and GFP-klp3(MDo). Note that GFP-klp3(MDo) was localized in the cytoplasm and its localization to microtubules became apparent during mitosis (the spindle marked by the green arrowhead). Scale bar, 5  $\mu$ m.

(c) Maximum projection images of wild type cells expressing mCherry-atb2p and GFP-klp3(MDo). Note that GFP-klp3(MDo) was localized in the cytoplasm and its localization to microtubules became apparent during mitosis (the spindle marked by the green arrowhead). Scale bar, 5  $\mu$ m.

(d) Quantification of the indicated patterns of mitochondria distribution in WT, WT GFP-klp3(MDo), mmb1 $\Delta$ , and mmb1 $\Delta$  GFP-klp3(MDo) cells. Note that GFP-klp3(MDo) did

not rescue mitochondria aggregation defects in *mmb1* $\Delta$  cells, nor did it cause apparent mitochondria aggression in WT cells.

**Figure S3: TagRFP tagged *rng2* actin binding domain is localized to actin filaments.**

(a) Schematic diagram depicting the subcellular localization of TagRFP tagged *rng2* actin binding domain (*rng2*(CHD)-RFP).

(b) Maximum projection images of wild type cells expressing GFP-cox4p and *rng2*(CHD)-RFP. Note that *rng2*(CHD)-RFP was localized to the actomyosin ring in mitosis and to actin patches and cables in interphase. Ectopic expression of *rng2*(CHD)-RFP had no effect on mitochondria distribution. Scale bar, 5  $\mu$ m.

(c) Maximum projection time-lapse images of *mmb1* $\Delta$  *rng2*(CHD)-TagRFP-tom22 and *mmb1* $\Delta$  *rng2*(CHD)-TagRFP cells expressing mCherry-*atb2* and GFP-cox4. Mitochondria (yellow arrow) were forced to position at the actomyosin ring by *rng2*(CHD)-TagRFP-tom22 but not *rng2*(CHD)-TagRFP. Scale bar, 5  $\mu$ m.

**Supplementary Imaging conditions**

Figure 1b-d and Figure S1b & S1d, Maximum projection Z-stack images: 21 optical planes, 0.25  $\mu$ m step size, 500 ms mCherry exposure, 500 ms GFP exposure, 3X EM gain.

Figure 2c & 2d and Figure S2b & S2c, Maximum projection Z-stack images: 21 optical planes, 0.25  $\mu$ m step size, 500 ms mCherry exposure, 500 ms GFP exposure, 3X EM gain.

Figure 2e & 2f, live-cell single-plane images: 1 optical plane, 2 Sec intervals, 500 ms mCherry exposure, 500 ms GFP exposure, 3X EM gain.

Figure 3a, Maximum projection Z-stack images: 21 optical planes, 0.25  $\mu$ m step size, 500 ms mCherry exposure, 500 ms GFP exposure, 3X EM gain.

Figure 3c, Maximum projection live-cell Z-stack images: 3 optical plane, 10 Sec intervals, 500 ms mCherry exposure, 500 ms GFP exposure, 3X EM gain.

Figure 4b-d and Figure S3b, Maximum projection Z-stack images: 21 optical planes, 0.25  $\mu$ m step size, 500 ms mCherry exposure, 500 ms GFP exposure, 3X EM gain.

Figure 4c and Figure S3c, Maximum projection live-cell Z-stack images: 11 optical plane, 0.5  $\mu$ m step size, 1 min intervals, 500 ms mCherry exposure, 500 ms GFP exposure, 3X EM gain.

## Supplementary Tables

Table S1. Yeast strains

| Strain          | Genotype                                                                                                                       | Source     |
|-----------------|--------------------------------------------------------------------------------------------------------------------------------|------------|
| <u>Figure 1</u> |                                                                                                                                |            |
| CF.2172         | GFP-atb2:KanR Leu1-32:ase1P*-ase1(291-731)-TagRFP-tom22 leu1-32 ura4-D18 h-                                                    | This study |
| CF.2310         | nmt1P*-GFP-cox4:LEU+ Ura4-294:ase1P*-ase1(291-731)-TagRFP-tom22 ade6-m210? leu1-32 ura4-294 h-                                 | This study |
| CF.2379         | nmt1P*-GFP-cox4:LEU+ mCherry-atb2:HygR ade6-m210? leu1-32 ura4-294 h+                                                          | This study |
| CF.2256         | mmb1Δ:KanR+ nmt1P*-GFP-cox4:LEU+ mCherry-atb2:HygR ade6-m210? leu1-32 ura4-294 h?                                              | This study |
| CF.2480         | mmb1Δ:KanR+ nmt1P*-GFP-cox4:LEU+ mCherry-atb2:HygR Ura4-294:ase1P*-ase1(291-731)-TagRFP-tom22 ade6-m210? leu1-32 ura4-294 h?   | This study |
| CF.3066         | nmt1P*-GFP-cox4:LEU+ mCherry-atb2:HygR Ura4-294:nmt1P*-ase1(291-731)-TagRFP ade6-m210? leu1-32 ura4-294 h+                     | This study |
| CF.3067         | mmb1Δ:KanR+ nmt1P*-GFP-cox4:LEU+ mCherry-atb2:HygR [pSGP572a-nmt1P*-ase1(291-731)-TagRFP:URA4+] ade6-m210? leu1-32 ura4-294 h- | This study |
| <u>Figure 2</u> |                                                                                                                                |            |
| CF.2379         | nmt1P*-GFP-cox4:LEU+ mCherry-atb2:HygR ade6-m210? leu1-32 ura4-294 h+                                                          | This study |
| CF.2256         | mmb1Δ:KanR+ nmt1P*-GFP-cox4:LEU+ mCherry-atb2:HygR ade6-m210? leu1-32 ura4-294 h?                                              | This study |
| CF.389          | mal3Δ:KanR+ nmt1P*-GFP-cox4:LEU+ mCherry-atb2:HygR ade6-m210? leu1-32 ura4-D18 h+                                              | This study |
| CF.379          | klp2Δ:URA4+ nmt1P*-GFP-cox4:LEU+ mCherry-atb2:HygR ade6-m210? leu1-32 ura4-D18 h+                                              | This study |
| CF.380          | klp3Δ:KanR+ nmt1P*-GFP-cox4:LEU+ mCherry-atb2:HygR ade6-m210? leu1-32 ura4-D18 h+                                              | This study |
| CF.381          | tea2Δ:KanR+ nmt1P*-GFP-cox4:LEU+ mCherry-atb2:HygR ade6-m210? leu1-32 ura4-D18 h+                                              | This study |
| CF.382          | klp5Δ:URA4+ nmt1P*-GFP-cox4:LEU+ mCherry-atb2:HygR ade6-m210? leu1-32 ura4-D18 his3.D1? h-                                     | This study |
| CF.383          | klp6Δ:URA4+ nmt1P*-GFP-cox4:LEU+ mCherry-atb2:HygR ade6-m210? leu1-32 ura4-D18 his3.D1? h-                                     | This study |
| CF.384          | klp8Δ:KanR+ nmt1P*-GFP-cox4:LEU+ mCherry-atb2:HygR ade6-m210? leu1-32 ura4-D18 h-                                              | This study |
| CF.384          | DHC1Δ:KanR+ nmt1P*-GFP-cox4:LEU+ mCherry-atb2:HygR ade6-m210? leu1-32 ura4-D18 h+                                              | This study |
| CF.3085         | klp2Δ:URA4+ DHC1Δ:KanR+ nmt1P*-GFP-cox4:LEU+ mCherry-atb2:HygR ade6-m210? leu1-32 ura4-D18 h-                                  | This study |
| CF.3060         | klp3Δ:KanR+ klp5Δ:URA4+ nmt1P*-GFP-cox4:LEU+ mCherry-atb2:HygR ade6-m210? leu1-32 ura4-D18 his3D1? h+                          | This study |
| CF.3062         | klp3Δ:KanR+ klp5Δ:URA4+ tea2Δ:KanR+ nmt1P*-GFP-cox4:LEU+ mCherry-atb2:HygR ade6-m210? leu1-32 ura4-D18 his3D1? h?              | This study |
| CF.2173         | GFP-atb2:KanR Leu1-32:ase1P*-klp3(1-335)-TagRFP-tom22 leu1-32 ura4-D18 h-                                                      | This study |
| CF.2311         | nmt1P*-GFP-cox4:LEU+ Ura4-294:ase1P*-klp3(1-335)-TagRFP-tom22 ade6-m210? leu1-32 ura4-294 h-                                   | This study |
| <u>Figure 3</u> |                                                                                                                                |            |
| CF.2481         | mmb1Δ:KanR+ nmt1P*-GFP-cox4:LEU+ mCherry-atb2:HygR Ura4-                                                                       | This study |

|                  |                                                                                                                                                                                          |            |
|------------------|------------------------------------------------------------------------------------------------------------------------------------------------------------------------------------------|------------|
| CF.2657          | 294:ase1P*-klp3(1-335)-TagRFP-tom22 ade6-m210? leu1-32 ura4-294 h?<br>nmt1P*-GFP-cox4:LEU+ mCherry-atb2:HygR Ura4-294:ase1P*-klp3(1-335)-<br>TagRFP-tom22 ade6-m210? leu1-32 ura4-294 h+ | This study |
| <u>Figure 4</u>  |                                                                                                                                                                                          |            |
| CF.2492          | nmt1P*-GFP-cox4:LEU+ Ura4-294:ase1P*-rng2(1-189)-TagRFP-tom22 ade6-<br>m210? leu1-32 ura4-294 h?                                                                                         | This study |
| CF.2379          | nmt1P*-GFP-cox4:LEU+ mCherry-atb2:HygR ade6-m210? leu1-32 ura4-294<br>h+                                                                                                                 | This study |
| CF.2256          | mmb1Δ:KanR+ nmt1P*-GFP-cox4:LEU+ mCherry-atb2:HygR ade6-m210?<br>leu1-32 ura4-294 h?                                                                                                     | This study |
| CF.2493          | mmb1Δ:KanR+ nmt1P*-GFP-cox4:LEU+ mCherry-atb2:HygR Ura4-<br>294:ase1P*-rng2(1-189)-TagRFP-tom22 ade6-m210? leu1-32 ura4-294 h?                                                           | This study |
| CF.3075          | mmb1Δ:KanR+ nmt1P*-GFP-cox4:LEU+ mCherry-atb2:HygR [pSGP572a-<br>nmt1P*- rng2(1-189)-TagRFP:URA4+] ade6-m210? leu1-32? ura4-294 h-                                                       | This study |
| <u>Figure S1</u> |                                                                                                                                                                                          |            |
| CF.3148          | GFP-cox4:KanMX Leu1-32:ase1P*-TagRFP-tom22 ade6-m210 leu1-32 ura4-<br>294 h-                                                                                                             | This study |
| CF.3150          | GFP-cox4:KanMX leu1-32:ase1P*-TagRFP-tom22 mCherry-atb2:HygR ade6-<br>m210? leu1-32 ura4-294 h-                                                                                          | This study |
| CF.3151          | mmb1Δ:KanR+ GFP-cox4:KanMX leu1-32:ase1P*-TagRFP-tom22 mCherry-<br>atb2:HygR ade6-m210? leu1-32 ura4-294 h?                                                                              | This study |
| CF.3065          | GFP-atb2:KanMX ura4-294: ase1P*-ase1(291-731)-TagRFP leu1-32 ura4-294<br>h?                                                                                                              | This study |
| <u>Figure S2</u> |                                                                                                                                                                                          |            |
| CF.3068          | nmt1P*-RFP-cox4:LEU+ [pSGP573-nmt1P*-GFP-klp3(1-335):URA4+] ade6-<br>m210 leu1-32 ura4-294 h-                                                                                            | This study |
| CF.3070          | nmt1P*-RFP-cox4:LEU+ GFP-atb2:KanMX [pSGP573-nmt1P*-GFP-klp3(1-<br>335):URA4+] ade6-m210 leu1-32 ura4-294 h+                                                                             | This study |
| CF.3071          | mmb1Δ:KanR+ nmt1P*-RFP-cox4:LEU+ GFP-atb2:KanMX [pSGP573-<br>nmt1P*-GFP-klp3(1-335):URA4+] ade6-m210? leu1-32 ura4-294 h-                                                                | This study |
| <u>Figure S3</u> |                                                                                                                                                                                          |            |
| CF.2492          | nmt1P*-GFP-cox4:LEU+ [pSGP572a- nmt1P*-rng2(1-189)-TagRFP:URA4+]<br>ade6-m210? leu1-32 ura4-294 h?                                                                                       | This study |

Table S2. Plasmids

| Plasmid         | Genotype                                  | Source     |
|-----------------|-------------------------------------------|------------|
| <u>Figure 1</u> |                                           |            |
| pCF.1693        | pJK210- ase1P*-ase1(291-731)-TagRFP-tom22 | This study |
| pCF.2022        | pSGP572a- nmt1P*-ase1(291-731)-TagRFP     | This study |
| <u>Figure 2</u> |                                           |            |
| pCF.1676        | pJK148- ase1P*-klp3(1-335)-TagRFP-tom22   | This study |
| pCF.1694        | pJK210- ase1P*-klp3(1-335)-TagRFP-tom22   | This study |
| <u>Figure 3</u> |                                           |            |
| pCF.1694        | pJK210- ase1P*-klp3(1-335)-TagRFP-tom22   | This study |
| <u>Figure 4</u> |                                           |            |
| pCF.1828        | pJK210- ase1P*-rng2(1-189)-TagRFP-tom22   | This study |
| pCF.2024        | pSGP572a- nmt1P*-rng2(1-189)-TagRFP       | This study |

Figure S1

pCF.2017 pJK148- ase1P\*-TagRFP-tom22

This study

Figure S2

pCF.2026 pSGP573-nmt1P\*-GFP-klp3(1-335)

This study

---

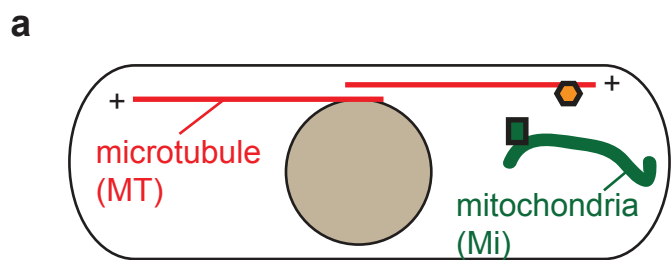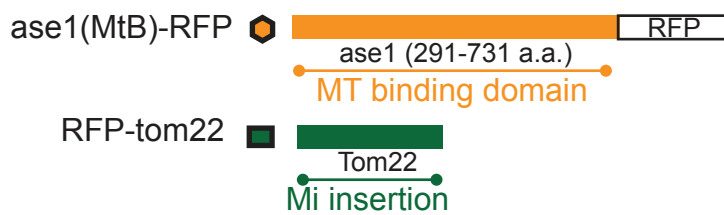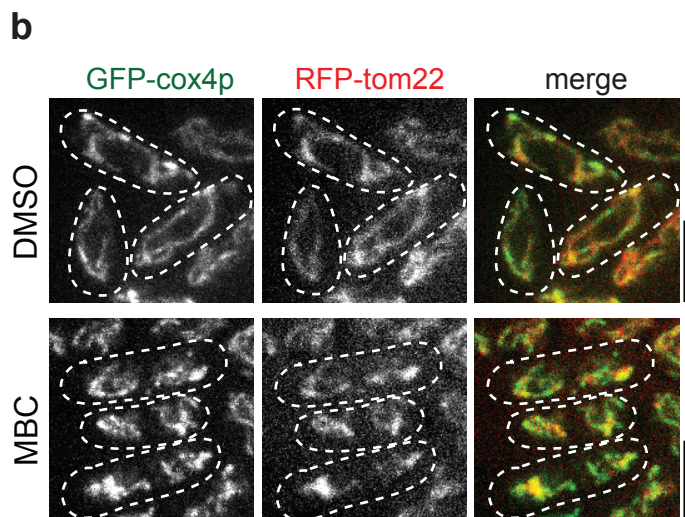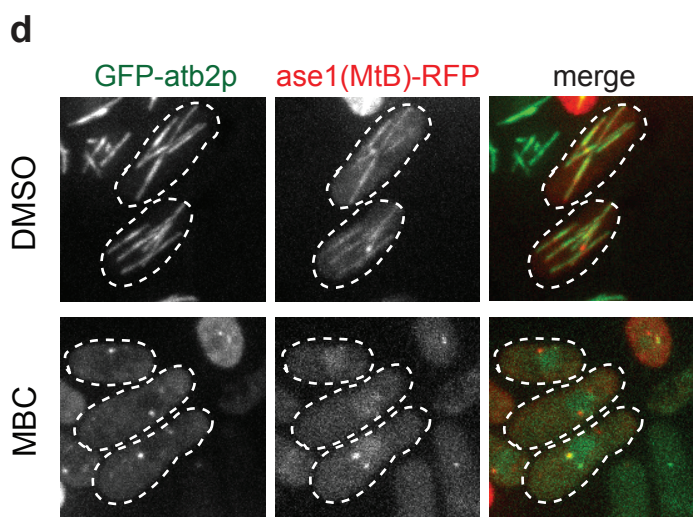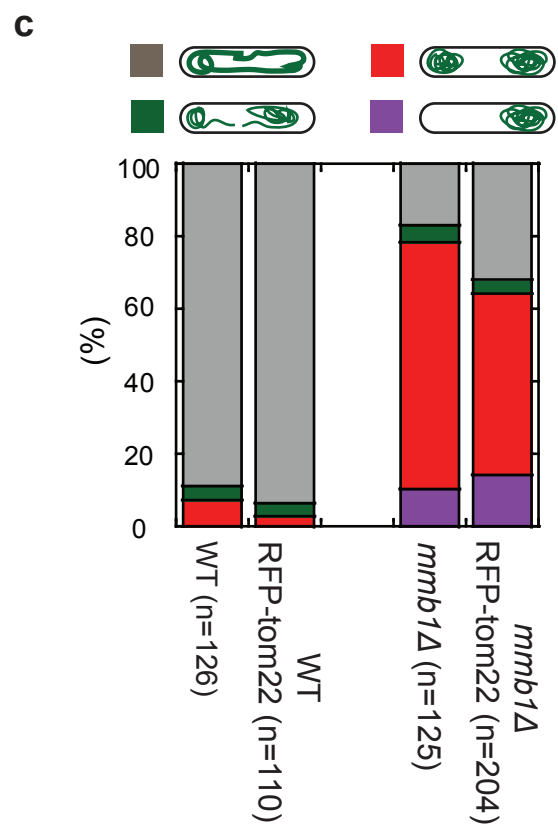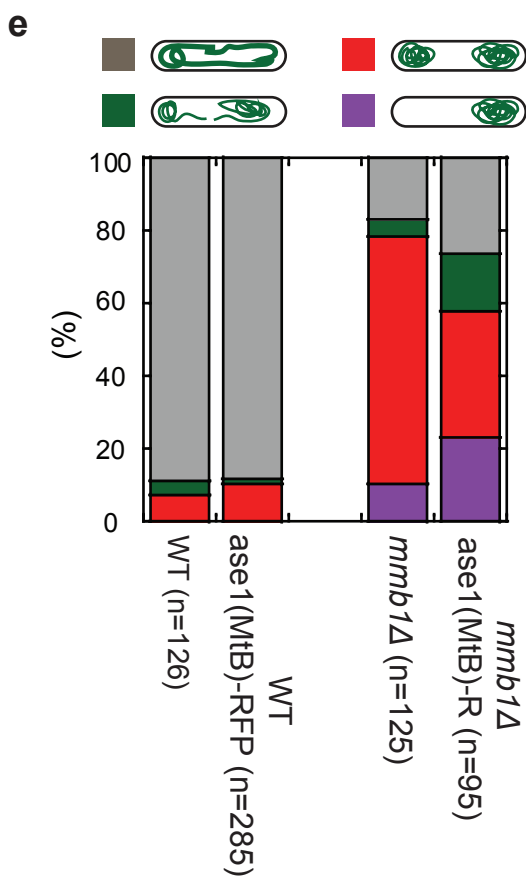

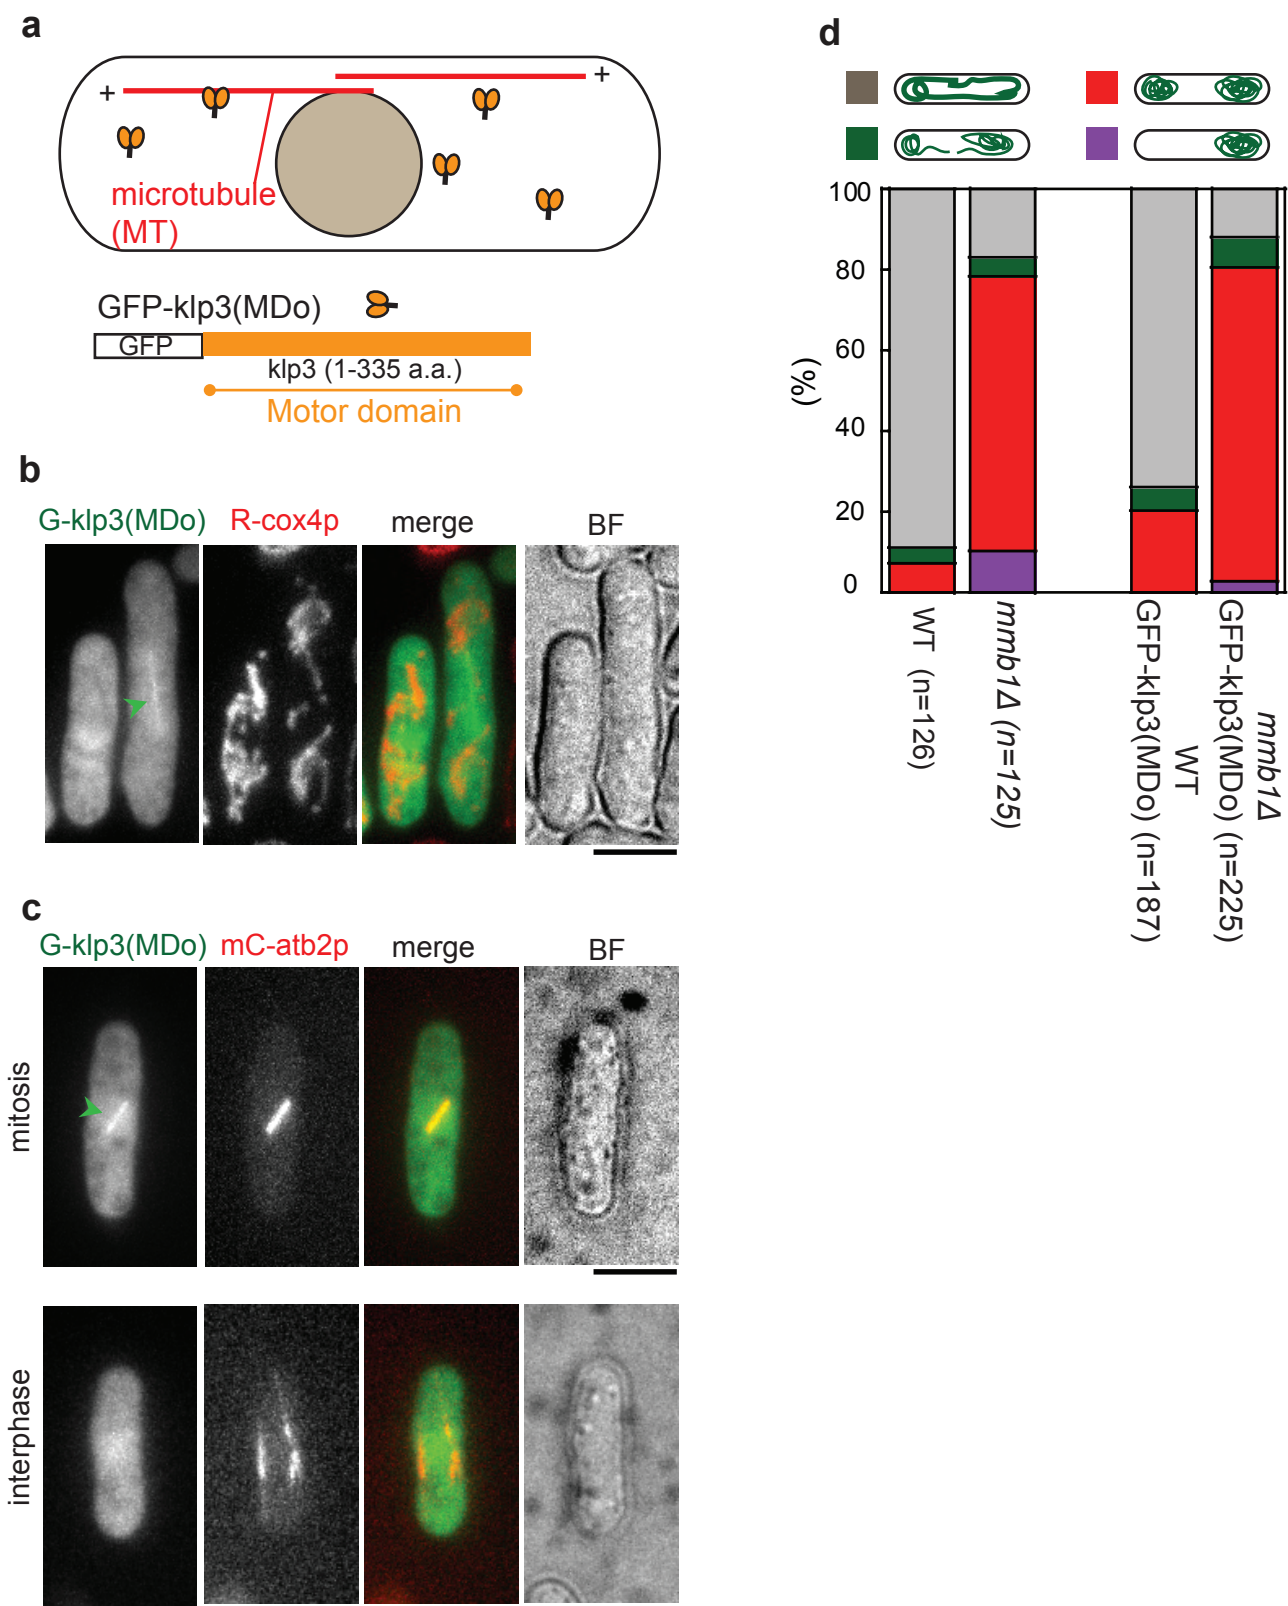



Supplementary Figure S3 Li et al.

**a**

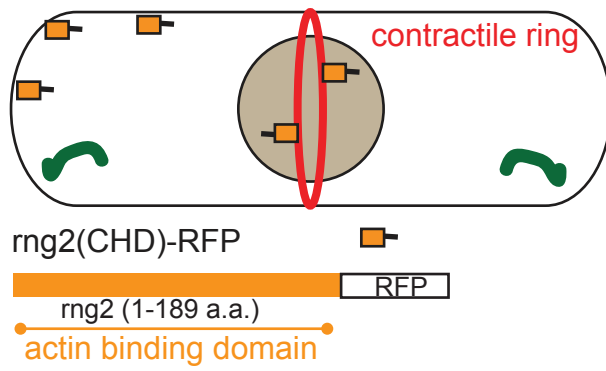

**b**

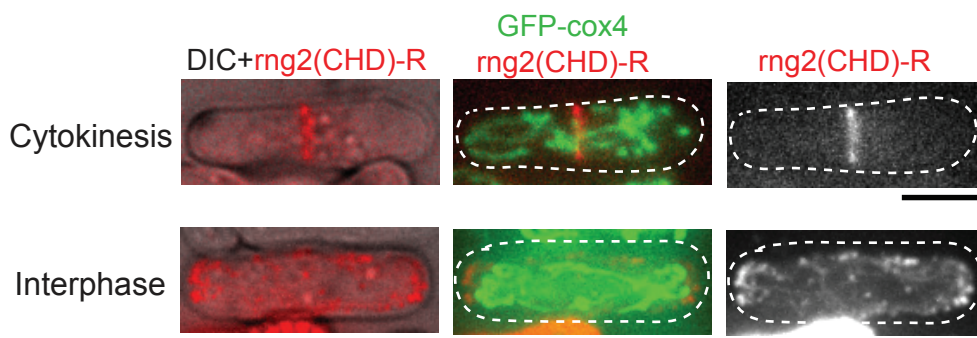

**c**

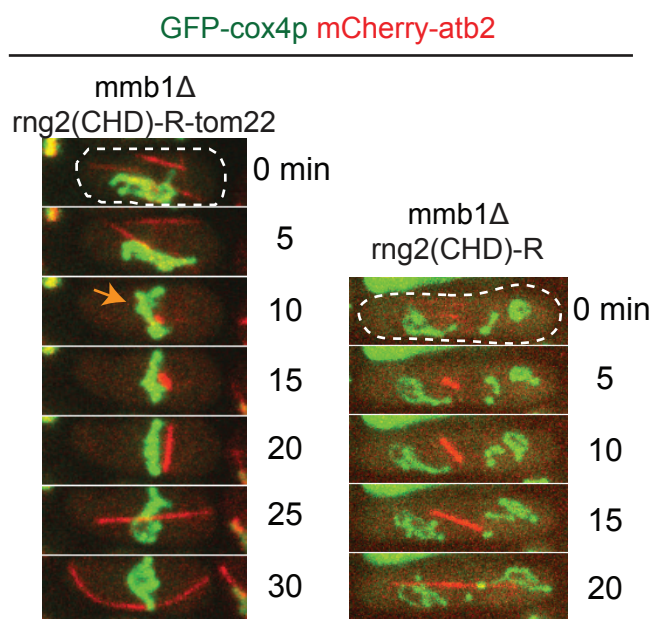

Supplement: srep11023-s1.pdf [file srep11023-s1.pdf]
